# Supplementary material for: Transmission of Hepatitis B and D Viruses in an African Rural Community
Source: PubMed Central journal article supplement (PMC6143728; doi:10.1128/msystems.00120-18), 2018-09-18

# A

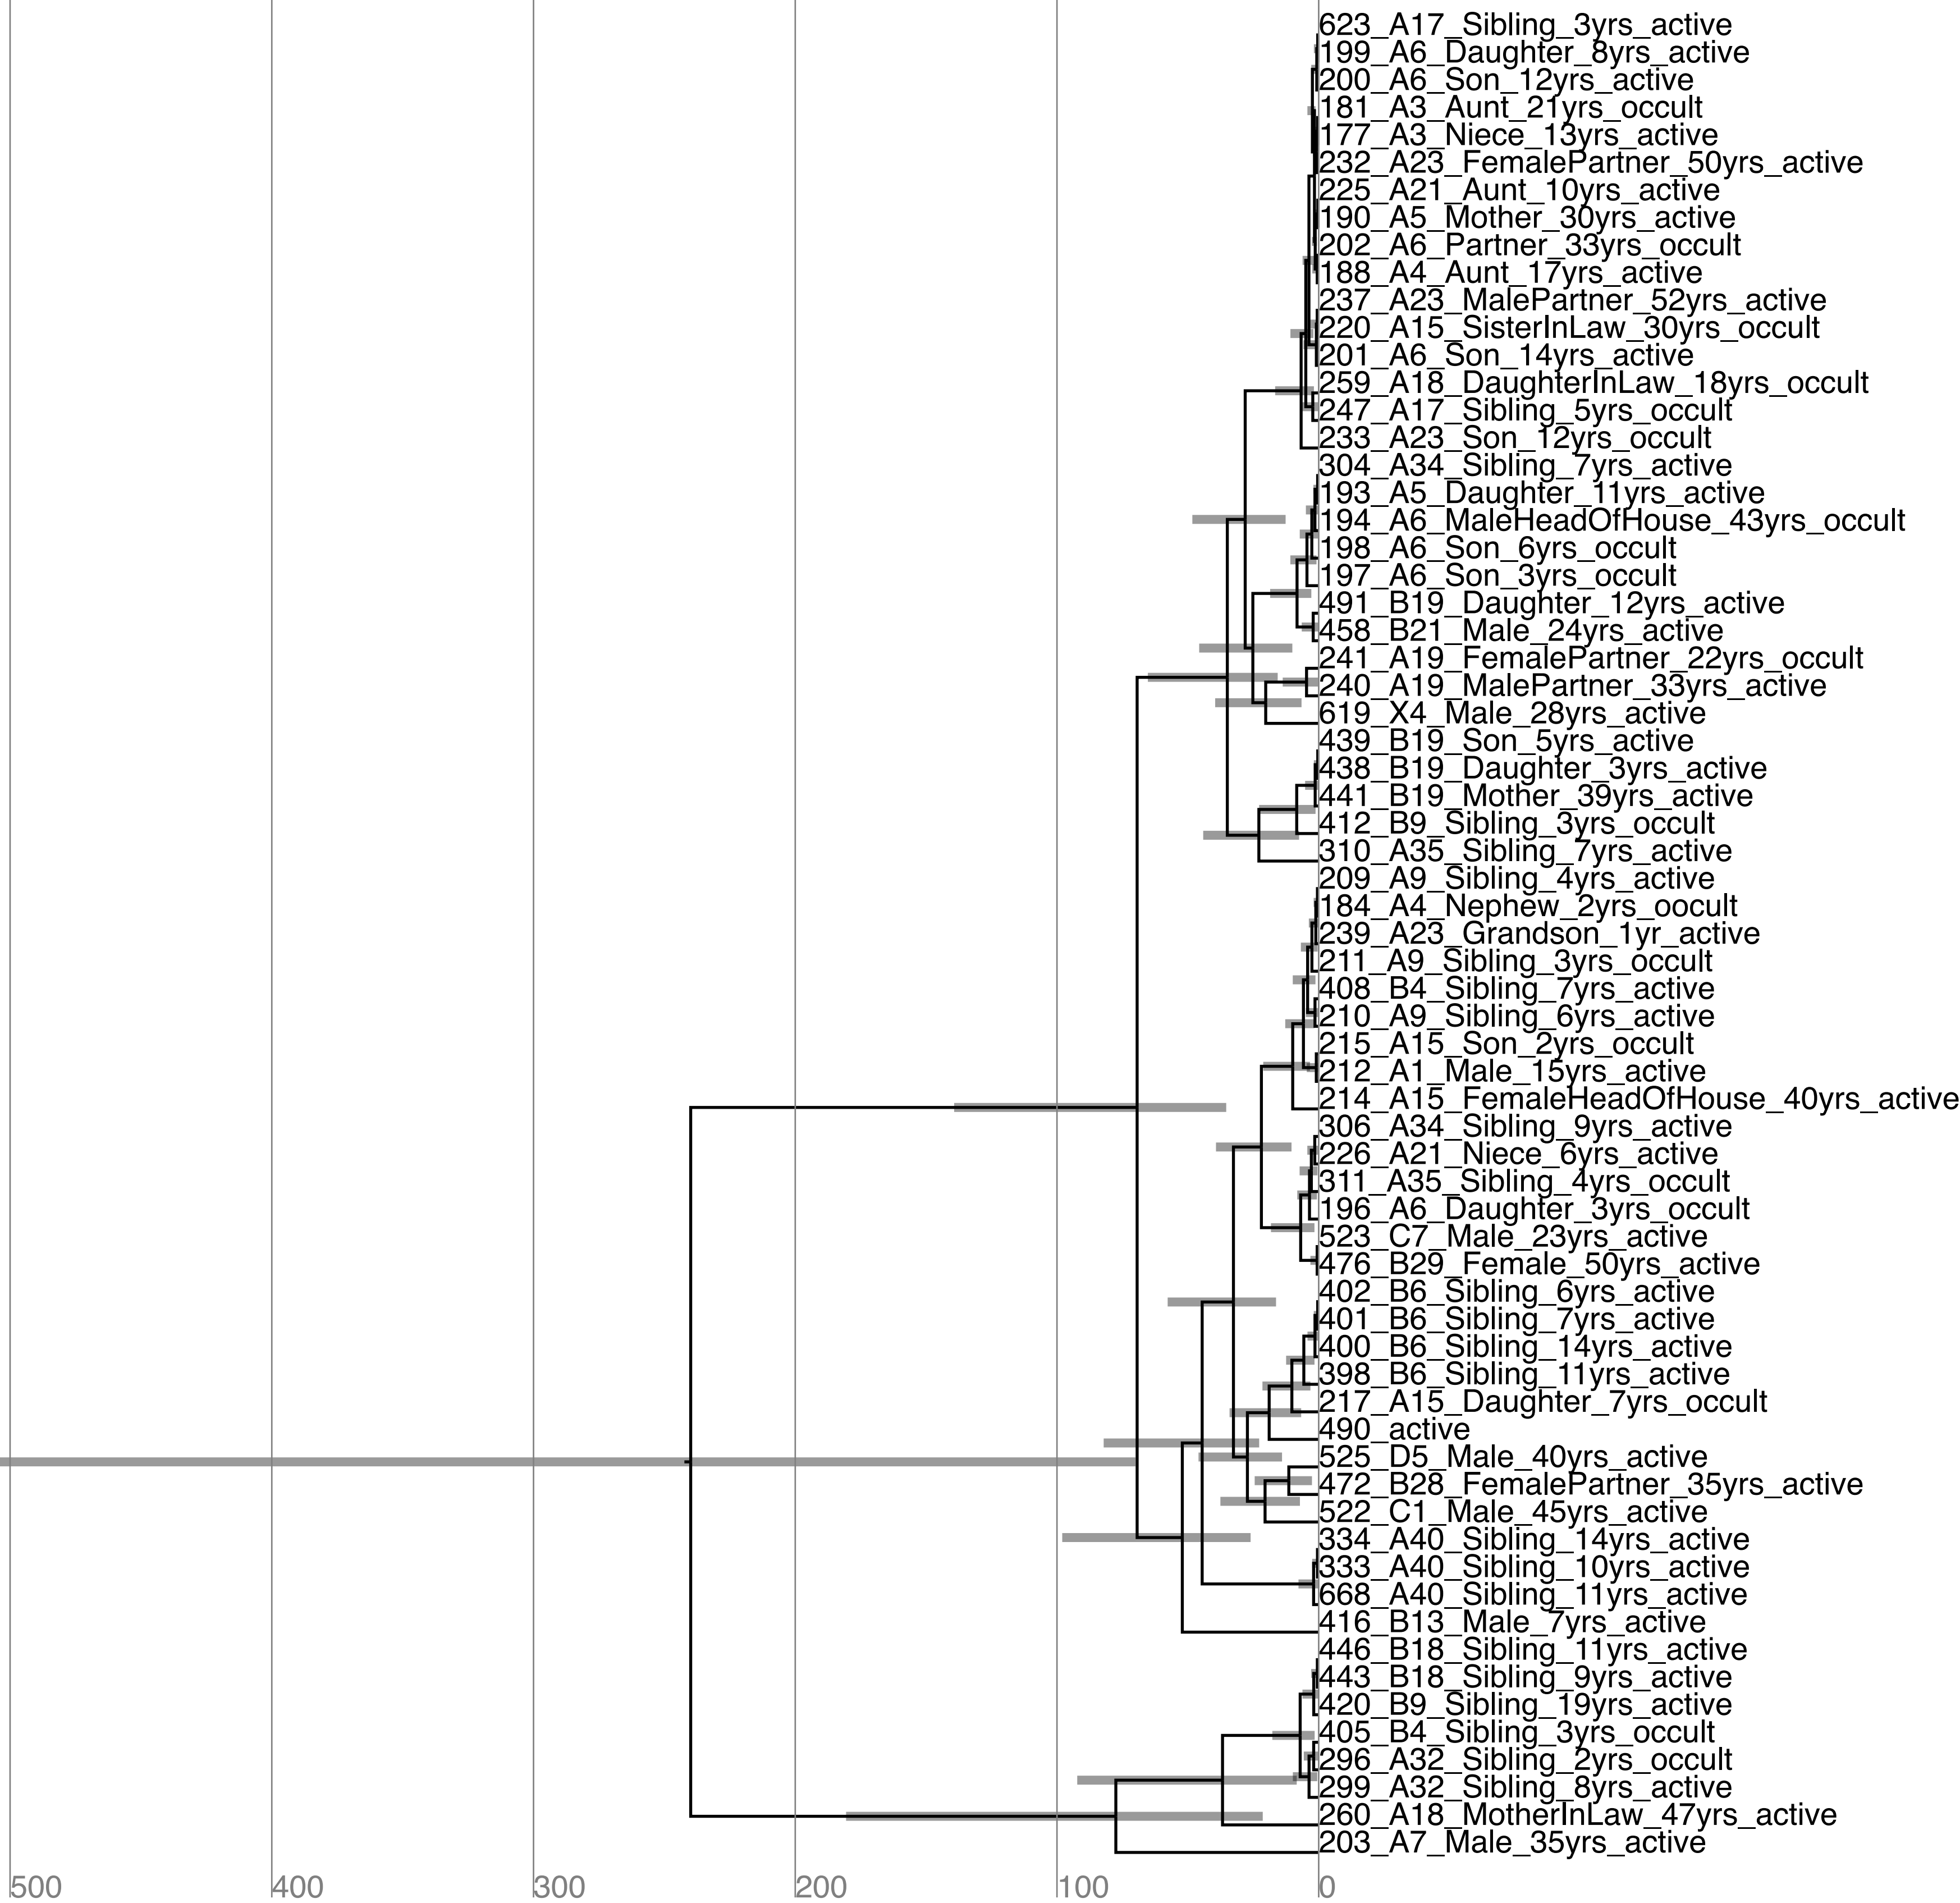

500

400

300

200

100

0

# B

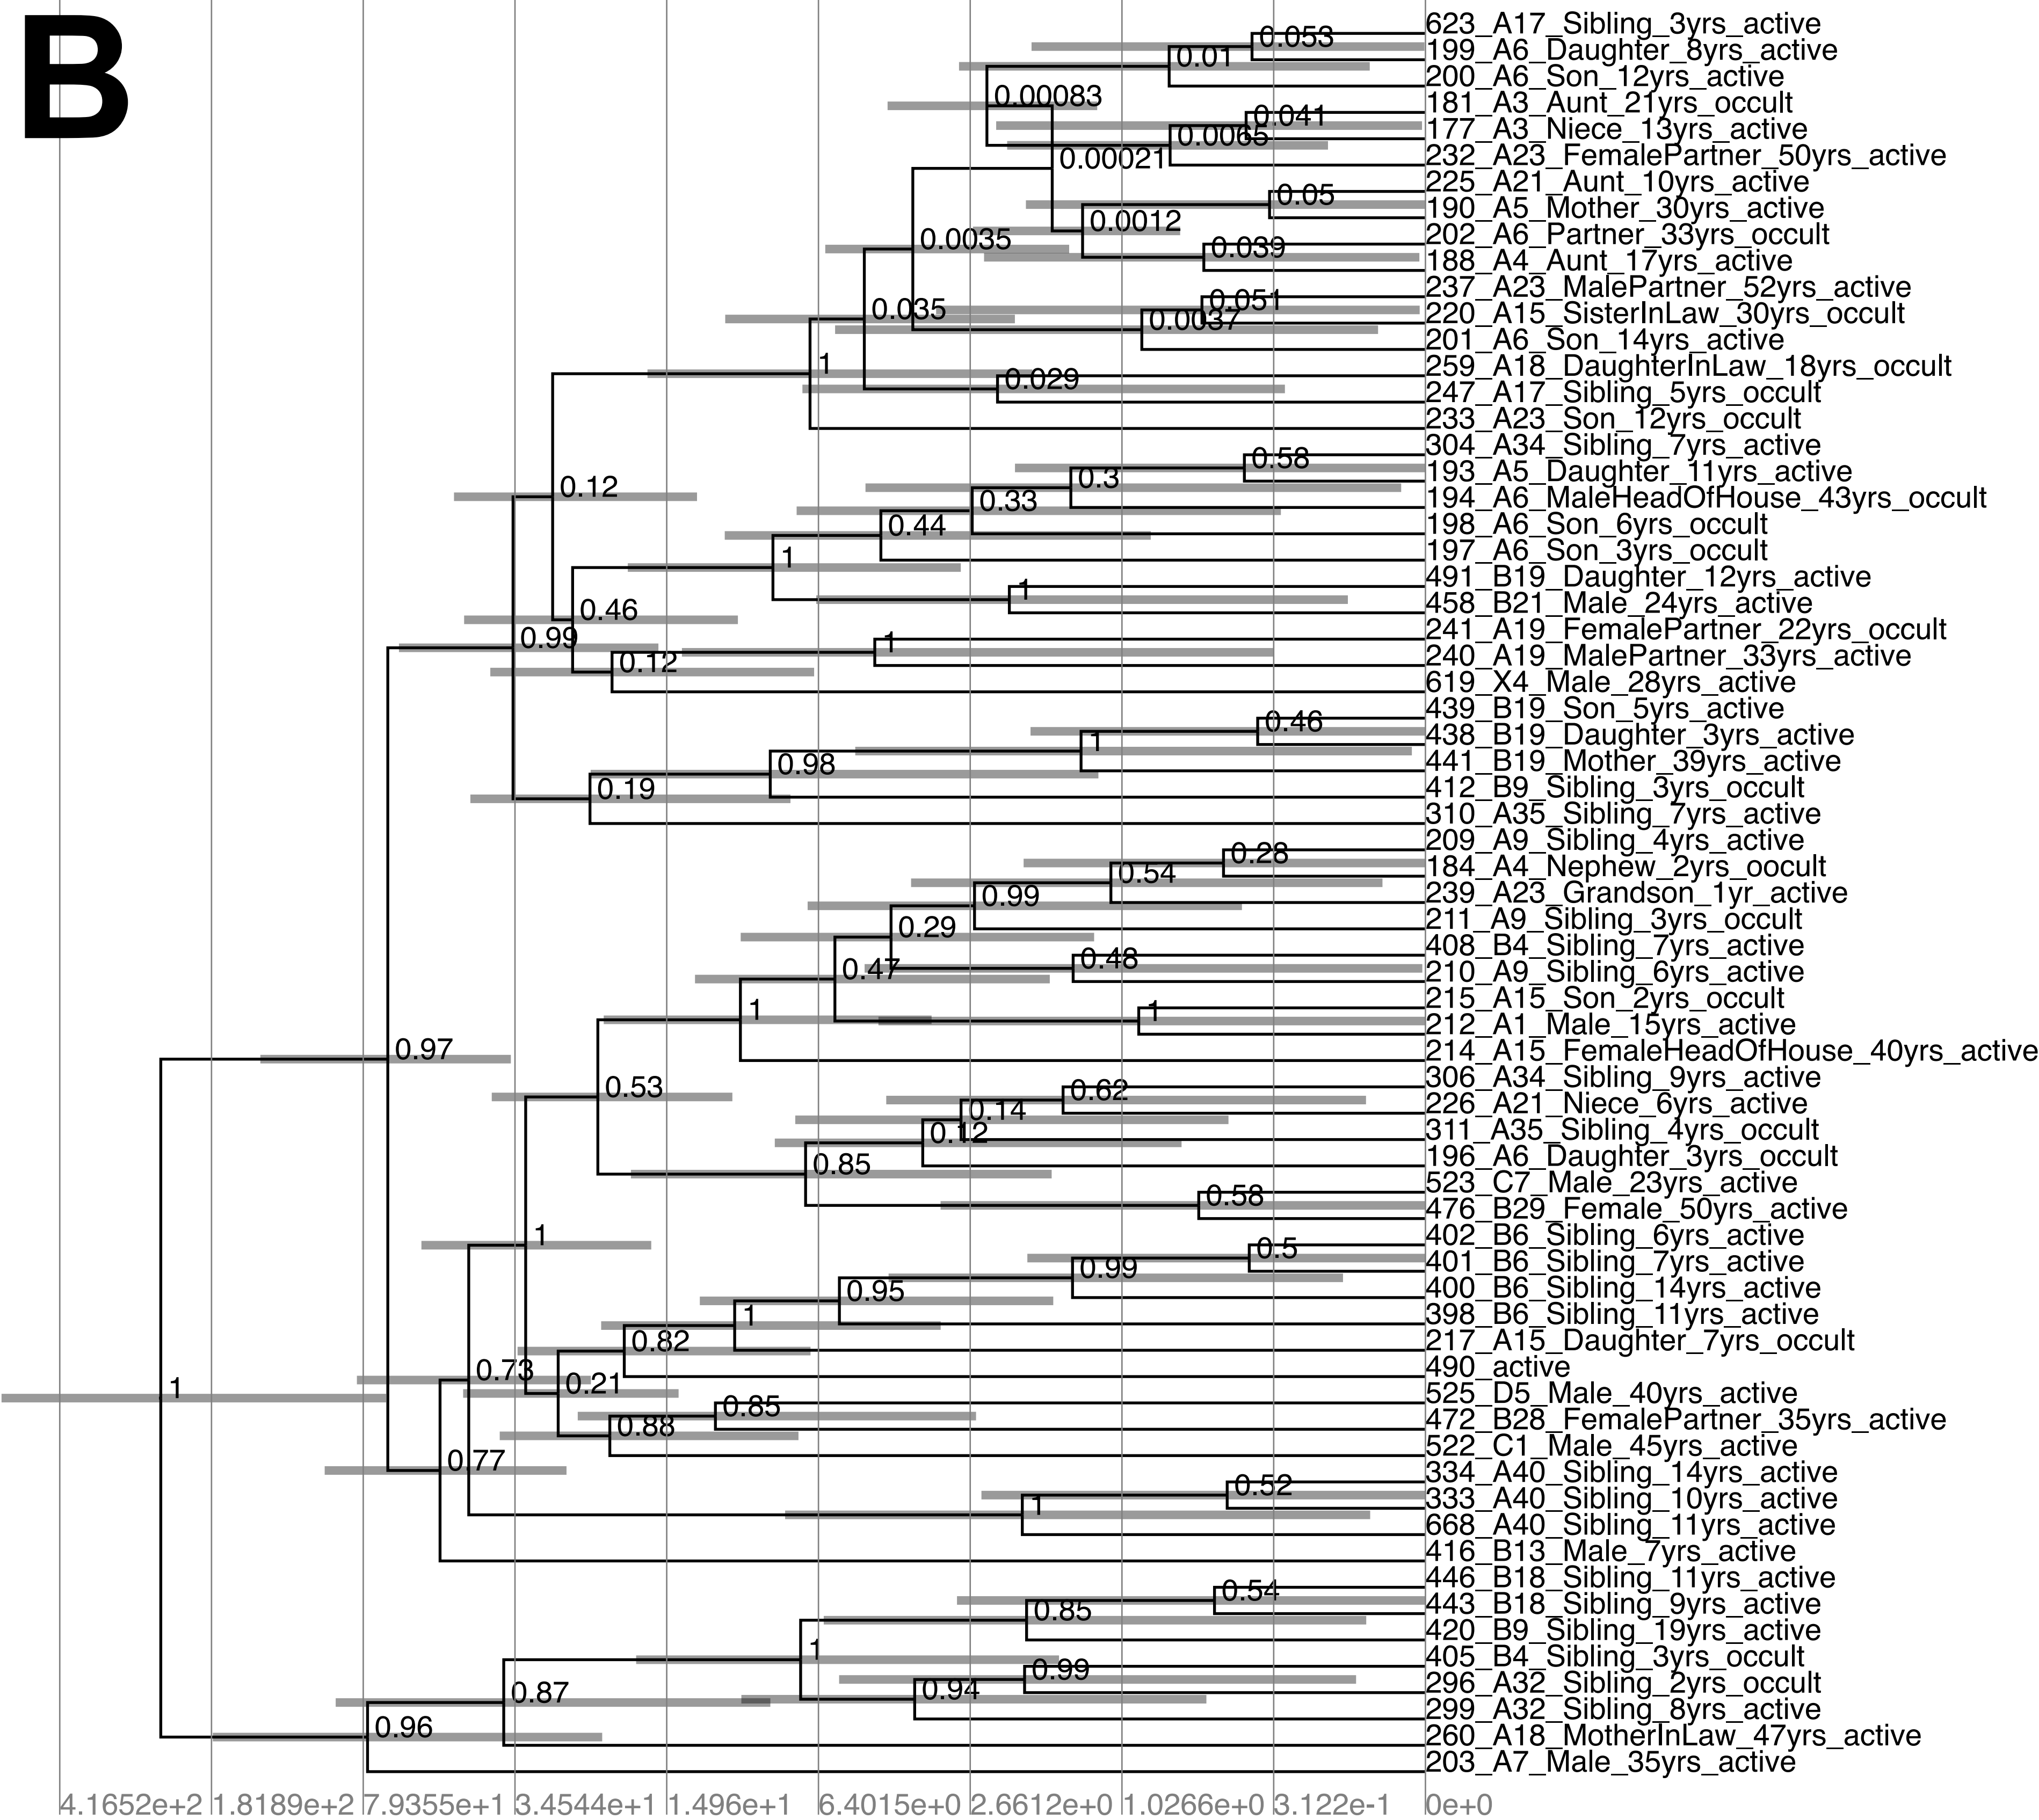

Supplement: sys005182262sf3.pdf [file sys005182262sf3.pdf]
