# Supplementary material for: Transmission of Hepatitis B and D Viruses in an African Rural Community
Source: PubMed Central journal article supplement (PMC6143728; doi:10.1128/msystems.00120-18), 2018-09-18
Supplement: sys005182262st1.pdf [file sys005182262st1.pdf]

**Table S1.** Primers used for HBV (whole genome and pre-S/S) and HDV (sHD gene fragment) nucleotide sequencing.

| Sequencing target     | Primer direction        | Primer ID (Reference) | 5'-Sequence-3'                            |
|-----------------------|-------------------------|-----------------------|-------------------------------------------|
| HBV whole genome      | Forward                 | C1 (1)                | CTGTGGAGTTACTCTCGTTTTTGC                  |
|                       |                         | P01 (2)               | GGACTCATAAGGTGGGGAA                       |
|                       |                         | P1(3)                 | CCGGAAAGCTTGAGCTCTTCTTTTTTACCTCTGCCTAATCA |
|                       |                         | PS1 (1)               | CCATATTCTTGGGAACAAGA                      |
|                       |                         | PS4 (4)               | ACACTCATCCTCAGGCCATGCAGTG                 |
|                       |                         | S1 (2)                | CTTCTCGAGGACTGGGGACC                      |
|                       |                         | S4 (5)                | TGCTGCTATGCCTCATCTTCT                     |
|                       |                         | S18 (5)               | GGATGATGTGGTATTGGGGGCCA                   |
|                       |                         | X1 (1)                | ACCTCCTTTCCATGGCTGCT                      |
|                       |                         | X5 (2)                | ACTCTTGGACTCBCAGCAATG                     |
|                       | Reverse                 | C8 (2)                | GAGGGAGTTCTTCTTCTAGG                      |
|                       |                         | P2 (3)                | CCGGAAAGCTTGAGCTCTTCAAAAAGTTGCATGGTGCTGG  |
|                       |                         | P3 (2)                | AAAGCCCAAAGACCCACAA                       |
|                       |                         | PS2 (1)               | GGTCCCCAGTCCTCGAGAAG                      |
|                       |                         | PS8 (4)               | TTCCTGAACTGGAGCCACCA                      |
| S2 (5)                | GGGTTTAAATGTATACCCAAAGA |                       |                                           |
| HBV PreS/S            | Forward                 | PS1 (1)               | CCATATTCTTGGGAACAAGA                      |
|                       |                         | PS4 (4)               | ACACTCATCCTCAGGCCATGCAGTG                 |
|                       | Reverse                 | PS8 (4)               | TTCCTGAACTGGAGCCACCA                      |
|                       |                         | S2 (5)                | GGGTTTAAATGTATACCCAAAGA                   |
| HBV S                 | Forward                 | PS1a (4)              | GGAAAACATCACATCAGGAT                      |
|                       |                         | PS1b (4)              | AAAATTCGCAGTCCCAACC                       |
|                       | Reverse                 | P3 (2)                | AAAGCCCAAAGACCCACAA                       |
| HDV sHD gene fragment | Forward                 | HDV-E (6)             | GAGATGCCATGCCGACCCGAAGAG                  |
|                       | Reverse                 | HDV-A (6)             | GAAGGAAGGCCCTCGAGAACAAGA                  |

Primer sequences were published previously by:

- (1) Niel C, Moraes MT, Gaspar AM, Yoshida CF, Gomes SA. 1994. *J Med Virol* 44:180-6.
- (2) de Pina-Araujo IIM, Spitz N, Soares CC, Niel C, Lago BV, Gomes SA. 2018. *PLoS One* 13:e0192595.
- (3) Gunther S, Li BC, Miska S, Kruger DH, Meisel H, Will H. 1995. *J Virol* 69:5437-44.
- (4) Ampah KA, Pinho-Nascimento CA, Kerber S, Asare P, De-Graft D, Adu-Nti F, Paixao IC, Niel C, Yeboah-Manu D, Pluschke G, Roltgen K. 2016. *PLoS One* 11:e0156864.
- (5) Bottecchia M, Souto FJ, O KM, Amendola M, Brandao CE, Niel C, Gomes SA. 2008. *BMC Microbiol* 8:11.
- (6) Casey JL, Brown TL, Colan EJ, Wignall FS, Gerin JL. 1993. *Proc Natl Acad Sci U S A* 90:9016-20.
