# Supplementary material for: Transmission of Hepatitis B and D Viruses in an African Rural Community
Source: PubMed Central journal article supplement (PMC6143728; doi:10.1128/msystems.00120-18), 2018-09-18
Supplement: sys005182262st2.pdf [file sys005182262st2.pdf]

**Table S2. SNPs and variations in the predicted HBV/E and HBV/A amino acid sequences obtained in this study.**

2a) Pre-S/S region of the 42 HBV/E sequences:

| Nucleotide position | Amino acid position | Nucleotides | Amino acids | No. of sequences | Amino acid change |        |        |
|---------------------|---------------------|-------------|-------------|------------------|-------------------|--------|--------|
| 6                   | 2                   | G/A         | G           | 39/2             | No                | Pre-S1 |        |
|                     |                     | G/T         | G           | 39/1             | No                |        |        |
| 21                  | 7                   | C/T         | V           | 41/1             | No                |        |        |
| 27                  | 9                   | C/A         | L           | 39/3             | No                |        |        |
| 43                  | 15                  | C/T         | H/Y         | 39/3             | Yes               |        |        |
| 48                  | 16                  | C/T         | S           | 39/3             | No                |        |        |
| 76                  | 26                  | G/A         | D/N         | 41/1             | Yes               |        |        |
| 96                  | 32                  | A/C         | A           | 36/6             | No                |        |        |
| 100                 | 34                  | A/C         | R           | 41/1             | No                |        |        |
| 101                 | 34                  | G/A         | R/K         | 41/1             | Yes               |        |        |
| 112                 | 38                  | A/C         | R           | 41/1             | No                |        |        |
| 113                 | 38                  | G/A         | R/K         | 33/9             | Yes               |        |        |
| 117                 | 39                  | T/C         | N           | 40/2             | No                |        |        |
| 129                 | 43                  | C/T         | D           | 41/1             | No                |        |        |
| 157                 | 53                  | G/A         | E/K         | 40/1             | Yes               |        |        |
|                     |                     | G/C         | E/Q         | 40/1             | Yes*              |        |        |
| 159                 | 53                  | A/G         | E/Q         | 41/1             | Yes*              |        |        |
| 198                 | 66                  | C/T         | F           | 41/1             | No                |        |        |
| 207                 | 69                  | A/C         | P           | 38/4             | No                |        |        |
| 225                 | 75                  | G/A         | G           | 41/1             | No                |        |        |
| 232                 | 78                  | C/A         | P/T         | 41/1             | Yes               |        |        |
| 254                 | 85                  | A/C         | K/T         | 41/1             | Yes               |        |        |
| 257                 | 86                  | C/T         | T/M         | 25/17            | Yes               |        |        |
| 258                 | 86                  | A/G         | T           | 21/21            | No                |        |        |
| 259                 | 87                  | T/G         | L/V         | 38/4             | Yes               |        |        |
| 265                 | 89                  | G/A         | A/T         | 32/10            | Yes               |        |        |
| 273                 | 91                  | G/T         | P           | 41/1             | No                |        |        |
| 285                 | 95                  | C/A         | S           | 41/1             | No                |        |        |
| 297                 | 99                  | G/A         | Q           | 41/1             | No                |        |        |
| 321                 | 107                 | C/A         | I           | 40/2             | No                |        |        |
| 326                 | 109                 | C/T         | P/L         | 40/2             | Yes               |        |        |
| 342                 | 114                 | T/G         | T           | 38/3             | No                |        |        |
|                     |                     | T/C         | T           | 38/1             | No                |        |        |
| 350                 | 117                 | A/T         | Q/L         | 41/1             | Yes               |        |        |
| 355                 | 119                 | A/G         | M/V         | 41/1             | Yes               |        |        |
| 357                 | 119                 | G/A         | M/I         | 41/1             | Yes               |        |        |
| 359                 | 120                 | A/G         | Q/R         | 41/1             | Yes               |        |        |
| 360                 | 120                 | G/A         | Q           | 41/1             | No                |        |        |
| 370                 | 124                 | A/C         | T/P         | 41/1             | Yes               |        |        |
| 373                 | 125                 | A/G         | T/A         | 32/10            | Yes               |        | Pre-S2 |

|      |     |           |           |           |     |
|------|-----|-----------|-----------|-----------|-----|
| 385  | 129 | G/A       | A/T       | 41/1      | Yes |
| 393  | 131 | G/A       | Q         | 41/1      | No  |
| 401  | 134 | G/A       | R/K       | 41/1      | Yes |
| 407  | 136 | G/A/(Del) | R/N/(Del) | 40/1/(1)  | Yes |
| 408  | 136 | A/G/(Del) | R/(Del)   | 38/1/(2)  | No  |
| 418  | 140 | T/C/(Del) | F/L/(Del) | 29/1/(12) | Yes |
| 421  | 141 | C/A       | P/T       | 41/1      | Yes |
| 440  | 147 | C/T       | S/F       | 41/1      | Yes |
| 449  | 150 | T/C       | V/A       | 40/2      | Yes |
| 466  | 156 | A/T       | T/S       | 41/1      | Yes |
| 470  | 157 | C/T       | A/V       | 38/4      | Yes |
| 509  | 170 | C/T       | P/L       | 41/1      | Yes |
| 513  | 171 | A/G       | A         | 41/1      | No  |
| 515  | 172 | C/G       | P/R       | 38/4      | Yes |
| 516  | 172 | G/A       | P         | 41/1      | No  |
| 527  | 176 | G/A       | S/N       | 41/1      | Yes |
| 541  | 181 | T/C       | F/L       | 41/1      | Yes |
| 555  | 185 | G/A       | L         | 41/1      | No  |
| 606  | 202 | G/A       | P         | 41/1      | No  |
| 607  | 203 | C/A       | Q/K       | 41/1      | Yes |
| 652  | 218 | G/A       | A/T       | 41/1      | Yes |
| 665  | 222 | T/G       | L/R       | 41/1      | Yes |
| 678  | 226 | G/A       | S         | 41/1      | No  |
| 686  | 229 | C/A       | P/Q       | 41/1      | Yes |
| 689  | 230 | C/T       | T/I       | 41/1      | Yes |
| 692  | 231 | C/G       | S/C       | 41/1      | Yes |
| 695  | 232 | A/G       | N/S       | 22/20     | Yes |
| 722  | 241 | T/C       | I/T       | 41/1      | Yes |
| 723  | 241 | T/C       | I         | 38/4      | No  |
| 732  | 244 | C/T       | G         | 39/3      | No  |
| 734  | 245 | A/T       | Y/F       | 41/1      | Yes |
| 750  | 250 | G/A       | L         | 41/1      | No  |
| 765  | 255 | C/A       | I         | 39/3      | No  |
| 843  | 281 | T/C       | P         | 41/1      | No  |
| 853  | 285 | G/A       | G/R       | 41/1      | Yes |
| 894  | 298 | G/A       | T         | 41/1      | No  |
| 898  | 300 | C/A       | L         | 41/1      | No  |
| 899  | 300 | T/C       | L/P       | 41/1      | Yes |
| 933  | 311 | C/T       | C         | 41/1      | No  |
| 938  | 313 | C/T       | S/L       | 41/1      | Yes |
| 1032 | 344 | C/T       | S         | 41/1      | No  |
| 1085 | 362 | C/T       | T/I       | 40/2      | Yes |
| 1127 | 376 | C/A       | P/Q       | 41/1      | Yes |
| 1161 | 387 | T/G       | P         | 40/2      | No  |
| 1196 | 399 | T/A       | I/N       | 41/1      | Yes |
| 1197 | 399 | T/C       | I         | 25/17     | No  |

S-region

a-determinant

2b) Pre-C/C region of the 35 HBV/E whole genome sequences:

| Nucleotide position | Amino acid position | Nucleotides | Amino acids | No. of sequences | Amino acid change |          |
|---------------------|---------------------|-------------|-------------|------------------|-------------------|----------|
| 13                  | 5                   | C/G         | H/D         | 34/1             | Yes               | Pre-core |
| 34                  | 12                  | T/C         | C/R         | 34/1             | Yes               |          |
| 83                  | 28                  | G/A         | W/Stop      | 33/2             | Yes               |          |
| 86                  | 29                  | G/A         | G/D         | 32/3             | Yes               |          |
| 96                  | 32                  | T/C         | I           | 34/1             | No                | Core     |
| 121                 | 41                  | A/T         | T/S         | 34/1             | Yes               |          |
| 125                 | 42                  | T/A         | V/E         | 34/1             | Yes               |          |
| 126                 | 42                  | G/C         | V           | 33/2             | No                |          |
| 138                 | 46                  | G/A         | S           | 32/3             | No                |          |
| 148                 | 50                  | T/C         | S/P         | 34/1             | Yes               |          |
| 156                 | 52                  | C/T         | F           | 31/4             | No                |          |
| 170                 | 57                  | G/A         | R/K         | 34/1             | Yes               |          |
| 186                 | 62                  | C/T         | T           | 34/1             | No                |          |
| 187                 | 63                  | G/A         | A           | 34/1             | No                |          |
| 188                 | 63                  | C/T         | A/I         | 34/1             | Yes               |          |
| 200                 | 67                  | A/T         | Y/F         | 33/2             | Yes               |          |
| 220                 | 74                  | C/T         | P/S         | 34/1             | Yes               |          |
| 231                 | 77                  | T/C         | C           | 34/1             | No                |          |
| 240                 | 80                  | C/T         | H           | 34/1             | No                |          |
| 243                 | 81                  | T/C         | H           | 19/16            | No                |          |
| 249                 | 83                  | A/T         | A           | 33/2             | No                |          |
| 250                 | 84                  | C/A         | L/I         | 34/1             | Yes               |          |
| 276                 | 92                  | G/A         | G           | 34/1             | No                |          |
| 277                 | 93                  | G/A         | E/N         | 34/1             | Yes*              |          |
| 279                 | 93                  | A/C         | E/N         | 32/1             | Yes*              |          |
|                     |                     | A/C         | E/D         | 32/1             | Yes               |          |
|                     |                     | A/T         | E/D         | 32/1             | Yes               |          |
| 280                 | 94                  | C/T         | L           | 34/1             | No                |          |
| 282                 | 94                  | A/T         | L           | 34/1             | No                |          |
| 287                 | 96                  | C/A         | T/N         | 33/2             | Yes               |          |
| 291                 | 97                  | A/G         | L           | 34/1             | No                |          |
| 293                 | 98                  | C/G         | A/G         | 34/1             | Yes*              |          |
| 294                 | 98                  | T/C         | A           | 29/5             | No                |          |
|                     |                     | T/A         | A/G         | 29/1             | Yes*              |          |
| 306                 | 102                 | T/G         | G           | 32/3             | No                |          |
| 308                 | 103                 | T/G         | V/G         | 33/1             | Yes               |          |
|                     |                     | T/C         | V/A         | 33/1             | Yes               |          |
| 312                 | 104                 | T/C         | N           | 34/1             | No                |          |
| 323                 | 108                 | C/A         | P/Q         | 34/1             | Yes               |          |
| 326                 | 109                 | C/G         | A/G         | 34/1             | Yes               |          |
| 336                 | 112                 | C/A         | D/E         | 34/1             | Yes               |          |

|     |     |     |     |       |      |
|-----|-----|-----|-----|-------|------|
| 345 | 115 | T/C | V   | 19/16 | No   |
| 354 | 118 | C/T | V   | 31/4  | No   |
| 361 | 121 | A/C | N/H | 34/1  | Yes  |
| 363 | 121 | T/C | N   | 34/1  | No   |
| 369 | 123 | C/A | G   | 31/4  | No   |
| 373 | 125 | A/C | K/Q | 34/1  | Yes  |
| 381 | 127 | G/A | R   | 30/5  | No   |
| 388 | 130 | T/A | L/M | 34/1  | Yes  |
| 402 | 134 | T/G | I/M | 34/1  | Yes  |
| 409 | 137 | C/A | L/I | 34/1  | Yes  |
| 411 | 137 | C/T | L   | 31/4  | No   |
| 413 | 138 | C/T | T/I | 34/1  | Yes  |
| 420 | 140 | A/G | G   | 34/1  | No   |
| 423 | 141 | A/G | R   | 34/1  | No   |
| 427 | 143 | A/C | T/L | 34/1  | Yes* |
| 428 | 143 | C/T | T/L | 34/1  | Yes* |
| 429 | 143 | C/T | T   | 20/15 | No   |
| 433 | 145 | A/G | I/V | 33/1  | Yes  |
|     |     | A/T | I/L | 33/1  | Yes  |
| 447 | 149 | G/A | V   | 34/1  | No   |
| 476 | 159 | C/A | P/Q | 33/2  | Yes  |
| 477 | 159 | A/C | P   | 34/1  | No   |
| 483 | 161 | C/T | Y   | 18/17 | No   |
| 489 | 163 | A/G | P   | 34/1  | No   |
| 491 | 164 | C/A | P/Q | 34/1  | Yes  |
| 519 | 173 | G/T | P   | 34/1  | No   |
| 524 | 175 | A/C | N/T | 31/4  | Yes  |
| 526 | 176 | A/T | T/S | 33/1  | Yes  |
|     |     | A/G | T/A | 33/1  | Yes  |
| 538 | 180 | C/T | R/S | 34/1  | Yes* |
| 539 | 180 | G/C | R/S | 34/1  | Yes* |
| 541 | 181 | A/C | R   | 32/3  | No   |
| 553 | 185 | C/T | P/S | 34/1  | Yes  |
| 610 | 204 | A/C | R   | 34/1  | No   |
| 625 | 209 | G/T | A/S | 34/1  | Yes  |
| 628 | 210 | T/G | S/A | 32/2  | Yes  |
|     |     | T/C | S/P | 32/1  | Yes  |
| 632 | 211 | A/G | Q/R | 34/1  | Yes  |

2c) X region of the 35 HBV/E whole genome sequences:

| Nucleotide position | Amino acid position | Nucleotides | Amino acids | No. of sequences | Amino acid change |
|---------------------|---------------------|-------------|-------------|------------------|-------------------|
| 34                  | 12                  | G/T         | A/S         | 34/1             | Yes               |
| 37                  | 13                  | A/C         | R           | 34/1             | No                |
| 64                  | 22                  | A/G         | S/G         | 32/3             | Yes               |
| 65                  | 22                  | G/A         | S/N         | 34/1             | Yes               |
| 73                  | 25                  | T/C         | S/P         | 32/3             | Yes               |
| 88                  | 30                  | G/A         | V/I         | 33/2             | Yes               |
| 101                 | 34                  | T/C         | L/P         | 31/4             | Yes               |
| 103                 | 35                  | G/A         | G/R         | 33/2             | Yes               |
| 107                 | 36                  | A/G         | D/G         | 24/11            | Yes               |
| 109                 | 37                  | C/T         | L           | 32/3             | No                |
| 111                 | 37                  | A/G         | L           | 26/9             | No                |
| 127                 | 43                  | T/A         | S/T         | 27/8             | Yes               |
| 138                 | 46                  | A/G         | P           | 31/4             | No                |
| 143                 | 48                  | A/T         | D/V         | 31/4             | Yes               |
| 154                 | 52                  | C/A         | H/N         | 34/1             | Yes               |
| 192                 | 64                  | A/G         | S           | 32/3             | No                |
| 201                 | 67                  | A/T         | G           | 28/7             | No                |
| 217                 | 73                  | T/G         | F/V         | 34/1             | Yes               |
| 240                 | 80                  | G/A         | E           | 34/1             | No                |
| 260                 | 87                  | A/G         | Q/R         | 34/1             | Yes               |
| 262                 | 88                  | A/C         | I/L         | 19/16            | Yes*              |
| 264                 | 88                  | C/A         | I/L         | 31/2             | Yes*              |
|                     |                     | C/A         | I           | 31/1             | No                |
|                     |                     | C/T         | I           | 31/1             | No                |
| 280                 | 94                  | C/T         | H/Y         | 34/1             | Yes               |
| 340                 | 114                 | G/A         | D/N         | 31/4             | Yes               |
| 351                 | 117                 | T/G         | F/L         | 33/1             | Yes               |
|                     |                     | T/C         | F           | 33/1             | No                |
| 354                 | 118                 | G/A         | K           | 32/3             | No                |
| 366                 | 122                 | G/A         | E           | 34/1             | No                |
| 368                 | 123                 | T/C         | L/S         | 18/17            | Yes               |
| 384                 | 128                 | A/G         | R           | 30/5             | No                |
| 387                 | 129                 | A/G         | L           | 34/1             | No                |
| 389                 | 130                 | A/T         | K/M         | 33/2             | Yes               |
| 391                 | 131                 | G/A         | V/I         | 33/2             | Yes               |
| 436                 | 146                 | G/T         | A/S         | 34/1             | Yes               |
| 453                 | 151                 | C/G         | F/L         | 34/1             | Yes               |

2d) P region of the 35 HBV/E whole genome sequences:

| Nucleotide position | Amino acid position | Nucleotides | Amino acids | No. of sequences | Amino acid change |
|---------------------|---------------------|-------------|-------------|------------------|-------------------|
| 26                  | 9                   | G/T         | R/L         | 34/1             | Yes               |
| 31                  | 11                  | A/C         | I/L         | 31/4             | Yes*              |
| 33                  | 11                  | A/T         | I/L         | 33/1             | Yes*              |
|                     |                     | A/G         | I/L         | 33/1             | Yes*              |
| 45                  | 15                  | C/T         | D           | 34/1             | No                |
| 46                  | 16                  | G/C         | E/Q         | 34/1             | Yes               |
| 48                  | 16                  | A/C         | E/D         | 32/3             | Yes               |
| 60                  | 20                  | C/T         | P           | 34/1             | No                |
| 117                 | 39                  | A/C         | E/D         | 34/1             | Yes               |
| 132                 | 44                  | G/T         | Q/H         | 34/1             | Yes               |
| 135                 | 45                  | T/G         | L           | 32/2             | No                |
|                     |                     | T/C         | L           | 32/1             | No                |
| 139                 | 47                  | A/G         | N/D         | 34/1             | Yes               |
| 153                 | 51                  | T/G         | P           | 34/1             | No                |
| 171                 | 57                  | A/C         | G           | 34/1             | No                |
| 199                 | 67                  | A/T         | I/L         | 31/4             | Yes               |
| 200                 | 67                  | T/C         | I/T         | 34/1             | Yes               |
| 201                 | 67                  | A/T         | I           | 34/1             | No                |
| 205                 | 69                  | G/A         | V/I         | 31/4             | Yes               |
| 228                 | 76                  | T/A         | T           | 32/3             | No                |
| 240                 | 80                  | T/C         | P           | 34/1             | No                |
| 252                 | 84                  | G/A         | L           | 34/1             | No                |
| 267                 | 89                  | T/C         | I           | 34/1             | No                |
| 268                 | 90                  | A/C         | N/H         | 34/1             | Yes               |
| 270                 | 90                  | C/T         | N           | 31/4             | No                |
| 291                 | 97                  | T/C         | G           | 32/3             | No                |
| 294                 | 98                  | T/G         | P           | 33/2             | No                |
| 295                 | 99                  | C/T         | L           | 34/1             | No                |
| 297                 | 99                  | A/G         | L           | 34/1             | No                |
| 303                 | 101                 | A/T         | V           | 32/3             | No                |
| 313                 | 105                 | C/A         | R           | 32/3             | No                |
| 316                 | 106                 | A/C         | R           | 32/3             | No                |
| 318                 | 106                 | A/G         | R           | 34/1             | No                |
| 324                 | 108                 | C/A         | N/K         | 34/1             | Yes               |
| 330                 | 110                 | C/T         | V           | 30/5             | No                |
| 331                 | 111                 | A/C         | M/L         | 34/1             | Yes               |
| 360                 | 120                 | G/A         | T           | 29/6             | No                |
| 369                 | 123                 | A/G         | L           | 19/15            | No                |
|                     |                     | A/T         | L/F         | 19/1             | Yes               |
| 372                 | 124                 | C/G         | P           | 32/2             | No                |
|                     |                     | C/T         | P           | 32/1             | No                |

|     |     |     |     |       |     |
|-----|-----|-----|-----|-------|-----|
| 375 | 125 | A/G | L   | 34/1  | No  |
| 381 | 127 | A/G | K   | 32/3  | No  |
| 387 | 129 | A/C | I   | 33/2  | No  |
| 393 | 131 | T/G | P   | 34/1  | No  |
| 402 | 134 | A/C | P   | 34/1  | No  |
| 411 | 137 | A/G | V   | 27/8  | No  |
| 426 | 142 | C/T | F   | 34/1  | No  |
| 433 | 145 | A/C | R   | 33/2  | No  |
| 450 | 150 | C/T | T   | 34/1  | No  |
| 453 | 151 | A/T | L   | 34/1  | No  |
| 462 | 154 | G/A | A   | 34/1  | No  |
| 465 | 155 | C/T | G   | 27/8  | No  |
| 480 | 160 | A/G | R   | 21/14 | No  |
| 486 | 162 | T/G | T   | 20/15 | No  |
| 506 | 169 | T/G | F/C | 19/16 | Yes |
| 534 | 178 | G/C | E/D | 34/1  | Yes |
| 547 | 183 | G/A | A/T | 33/2  | Yes |
| 562 | 188 | C/T | P/S | 34/1  | Yes |
| 568 | 190 | C/A | R   | 32/3  | No  |
| 584 | 195 | C/T | S/L | 32/3  | Yes |
| 589 | 197 | C/T | H/Y | 33/2  | Yes |
| 637 | 213 | A/C | I/L | 31/4  | Yes |
| 641 | 214 | A/C | Q/P | 34/1  | Yes |
| 642 | 214 | G/A | Q   | 34/1  | No  |
| 653 | 218 | A/C | Q/P | 34/1  | Yes |
| 654 | 218 | G/A | Q   | 28/7  | No  |
| 658 | 220 | T/C | S/P | 34/1  | Yes |
| 698 | 233 | G/C | R/T | 34/1  | Yes |
| 700 | 234 | A/G | S/G | 34/1  | Yes |
| 739 | 247 | C/T | H/Y | 34/1  | Yes |
| 748 | 250 | A/C | T/P | 31/4  | Yes |
| 773 | 258 | C/A | P/H | 34/1  | Yes |
| 795 | 265 | A/C | K/N | 34/1  | Yes |
| 798 | 266 | C/T | N   | 21/14 | No  |
| 799 | 267 | G/A | V/I | 18/17 | Yes |
| 800 | 267 | T/G | V/S | 32/3  | Yes |
| 806 | 269 | G/A | S/N | 27/8  | Yes |
| 814 | 272 | G/T | A/S | 34/1  | Yes |
| 838 | 280 | G/A | V/I | 34/1  | Yes |
| 862 | 288 | C/A | H/N | 33/2  | Yes |
| 867 | 289 | C/T | S   | 34/1  | No  |
| 883 | 295 | T/G | S/A | 32/2  | Yes |
|     |     | T/C | S/P | 32/1  | Yes |
| 891 | 297 | A/T | S   | 34/1  | No  |

|      |     |           |         |          |     |
|------|-----|-----------|---------|----------|-----|
| 896  | 299 | A/G       | H/R     | 34/1     | Yes |
| 900  | 300 | A/G       | A       | 34/1     | No  |
| 911  | 304 | A/C       | H/P     | 34/1     | Yes |
| 914  | 305 | A/G       | N/S     | 27/8     | Yes |
| 926  | 309 | G/A       | S/N     | 34/1     | Yes |
| 934  | 312 | G/A       | G/R     | 34/1     | Yes |
| 942  | 314 | G/A       | Q       | 34/1     | No  |
| 948  | 316 | G/A/(Del) | K/(Del) | 33/1/(1) | No  |
| 981  | 327 | C/T       | F       | 34/1     | No  |
| 990  | 330 | C/T       | S       | 34/1     | No  |
| 1007 | 336 | A/T       | Y/F     | 34/1     | Yes |
| 1011 | 337 | C/T       | C       | 32/3     | No  |
| 1050 | 350 | C/T       | P       | 34/1     | No  |
| 1054 | 352 | A/G       | T/A     | 34/1     | Yes |
| 1056 | 352 | C/G       | T       | 31/4     | No  |
| 1148 | 383 | C/A       | A/E     | 34/1     | Yes |
| 1206 | 402 | T/G       | S       | 34/1     | No  |
| 1227 | 409 | C/A       | P       | 34/1     | No  |
| 1230 | 410 | C/T       | N       | 34/1     | No  |
| 1233 | 411 | C/G       | L       | 34/1     | No  |
| 1236 | 412 | A/G       | Q       | 19/16    | No  |
| 1263 | 421 | T/C       | N       | 34/1     | No  |
| 1264 | 422 | T/C       | L       | 31/4     | No  |
| 1273 | 425 | C/T       | L       | 32/3     | No  |
| 1275 | 425 | A/T       | L       | 34/1     | No  |
| 1306 | 436 | C/A       | L/I     | 33/2     | Yes |
| 1384 | 462 | T/C       | S/P     | 34/1     | Yes |
| 1394 | 465 | G/A       | R/K     | 34/1     | Yes |
| 1435 | 479 | G/A       | D/N     | 34/1     | Yes |
| 1439 | 480 | C/A       | S/Y     | 34/1     | Yes |
| 1440 | 480 | T/C       | S       | 34/1     | No  |
| 1474 | 492 | C/T       | L       | 34/1     | No  |
| 1479 | 493 | C/T       | F       | 34/1     | No  |
| 1573 | 525 | C/T       | L       | 34/1     | No  |
| 1626 | 542 | C/T       | H       | 34/1     | No  |
| 1668 | 556 | C/A       | A       | 34/1     | No  |
| 1702 | 568 | T/G       | S/A     | 33/2     | Yes |
| 1737 | 579 | T/A       | H/Q     | 34/1     | Yes |
| 1738 | 580 | T/C       | L       | 20/15    | No  |
| 1744 | 582 | C/T       | P/S     | 31/3     | Yes |
|      |     | C/G       | P/A     | 31/1     | Yes |
| 1746 | 582 | C/T       | P       | 34/1     | No  |
| 1749 | 583 | C/T       | N       | 34/1     | No  |
| 1759 | 587 | A/C       | R       | 31/4     | No  |



|      |     |     |     |       |     |
|------|-----|-----|-----|-------|-----|
| 1761 | 587 | A/G | R   | 34/1  | No  |
| 1773 | 591 | C/A | S   | 34/1  | No  |
| 1774 | 592 | C/T | L   | 34/1  | No  |
| 1777 | 593 | A/C | N/H | 20/15 | Yes |
| 1788 | 596 | T/C | G   | 32/3  | No  |
| 1805 | 602 | G/T | W/F | 34/1  | Yes |
| 1806 | 602 | G/T | W   | 34/1  | No  |
| 1809 | 603 | G/A | G   | 32/2  | No  |
|      |     | G/C | G   | 32/1  | No  |
| 1812 | 604 | A/T | S   | 33/2  | No  |
| 1821 | 607 | G/A | Q   | 31/4  | No  |
| 1830 | 610 | C/T | I   | 34/1  | No  |
| 1832 | 611 | G/A | R/K | 18/17 | Yes |
| 1834 | 612 | A/T | L/M | 19/16 | Yes |
| 1836 | 612 | G/A | L   | 26/9  | No  |
| 1872 | 624 | C/T | N   | 34/1  | No  |
| 1875 | 625 | G/A | R   | 32/3  | No  |
| 1903 | 635 | A/C | I/L | 32/3  | Yes |
| 1920 | 640 | C/T | G   | 32/3  | No  |
| 1944 | 648 | T/C | C   | 34/1  | No  |
| 1950 | 650 | T/C | Y   | 34/1  | No  |
| 1965 | 655 | T/G | P   | 34/1  | No  |
| 1968 | 656 | G/A | L   | 34/1  | No  |
| 1972 | 658 | G/A | A/T | 30/5  | Yes |
| 1974 | 658 | G/A | A   | 34/1  | No  |
| 1979 | 660 | T/C | I/T | 24/11 | Yes |
| 1984 | 662 | T/G | S/A | 31/4  | Yes |
| 1985 | 662 | C/A | S/Y | 31/4  | Yes |
| 2004 | 668 | C/T | F   | 34/1  | No  |
| 2022 | 674 | C/T | A   | 34/1  | No  |
| 2032 | 678 | A/C | K/Q | 30/5  | Yes |
| 2041 | 681 | C/A | L/M | 34/1  | Yes |
| 2042 | 681 | T/A | L/Q | 33/1  | Yes |
|      |     | T/G | L/R | 33/1  | Yes |
| 2044 | 682 | A/T | N/Y | 34/1  | Yes |
| 2071 | 691 | C/T | P/S | 34/1  | Yes |
| 2072 | 691 | C/A | P/Q | 31/4  | Yes |
| 2073 | 691 | A/T | P   | 34/1  | No  |
| 2088 | 696 | G/A | V   | 32/3  | No  |
| 2112 | 704 | C/T | G   | 32/3  | No  |
| 2127 | 709 | A/G | I/M | 34/1  | Yes |
| 2139 | 713 | C/T | R   | 34/1  | No  |
| 2140 | 714 | A/G | M/V | 32/3  | Yes |
| 2212 | 738 | A/C | R   | 31/4  | No  |

|      |     |     |     |       |     |
|------|-----|-----|-----|-------|-----|
| 2220 | 740 | A/G | G   | 27/8  | No  |
| 2223 | 741 | G/A | A   | 20/14 | No  |
|      |     | G/T | A   | 20/1  | No  |
| 2224 | 742 | A/C | K/Q | 34/1  | Yes |
| 2225 | 742 | A/C | K/T | 30/5  | Yes |
| 2232 | 744 | C/T | I   | 33/2  | No  |
| 2235 | 745 | G/A | G   | 27/8  | No  |
| 2238 | 746 | T/A | T   | 18/17 | No  |
| 2247 | 749 | T/C | S   | 31/4  | No  |
| 2250 | 750 | C/T | V   | 32/3  | No  |
| 2274 | 758 | A/C | S   | 34/1  | No  |
| 2313 | 771 | G/T | L   | 34/1  | No  |
| 2316 | 772 | A/C | R   | 34/1  | No  |
| 2343 | 781 | A/G | S   | 32/3  | No  |
| 2344 | 782 | G/A | A/T | 34/1  | Yes |
| 2352 | 784 | T/C | N   | 32/3  | No  |
| 2367 | 789 | G/A | P   | 33/2  | No  |
| 2380 | 794 | T/C | L   | 31/4  | No  |
| 2382 | 794 | G/A | L   | 33/2  | No  |
| 2386 | 796 | A/G | I/V | 24/11 | Yes |
| 2388 | 796 | C/T | I   | 32/3  | No  |
| 2390 | 797 | A/G | Y/C | 26/9  | Yes |
| 2406 | 802 | T/A | R   | 27/8  | No  |
| 2417 | 806 | A/G | Q/R | 31/4  | Yes |
| 2422 | 808 | A/T | T/S | 31/4  | Yes |
| 2433 | 811 | C/A | R   | 34/1  | No  |
| 2471 | 824 | A/G | H/R | 32/3  | Yes |
| 2480 | 827 | A/T | D/V | 28/7  | Yes |
| 2496 | 832 | T/G | A   | 34/1  | No  |

2e) Pre-S/S region of the 7 HBV/A sequences:

| Nucleotide position | Amino acid position | Nucleotides | Amino acids | No. of sequences | Amino acid change |          |
|---------------------|---------------------|-------------|-------------|------------------|-------------------|----------|
| 6                   | 2                   | A/G         | G           | 6/1              | No                | Pre-S1   |
| 13                  | 5                   | T/A         | L/I         | 6/1              | Yes               |          |
| 96                  | 32                  | T/C         | P           | 6/1              | No                |          |
| 159                 | 53                  | G/A         | P           | 4/3              | No                |          |
| 183                 | 61                  | A/C         | G           | 6/1              | No                |          |
| 217                 | 73                  | G/A         | G/S         | 6/1              | Yes               |          |
| 233                 | 78                  | G/C         | S/T         | 6/1              | Yes               |          |
| 289                 | 97                  | A/G         | T/A         | 6/1              | Yes               |          |
| 305                 | 102                 | G/A         | G/E         | 6/1              | Yes               |          |
| 318                 | 106                 | T/A         | T           | 6/1              | No                |          |
| 342                 | 114                 | G/C         | E/D         | 4/3              | Yes               |          |
| 360                 | 120                 | G/A         | M/I         | 6/1              | Yes               | Pre-S2   |
| 363                 | 121                 | G/A         | Q           | 6/1              | No                |          |
| 376                 | 126                 | A/C         | T/P         | 6/1              | Yes               |          |
| 384                 | 128                 | C/T         | H           | 5/2              | No                |          |
| 390                 | 130                 | T/C         | A           | 6/1              | No                |          |
| 393                 | 131                 | G/A         | L           | 6/1              | No                |          |
| 405                 | 135                 | G/A         | R           | 6/1              | No                |          |
| 412                 | 138                 | G/A         | G/S         | 6/1              | Yes               |          |
| 414                 | 138                 | T/C         | G           | 4/3              | No                |          |
| 421                 | 141                 | T/C         | F/L         | 6/1              | Yes               |          |
| 423                 | 141                 | C/T         | F           | 6/1              | No                |          |
| 428                 | 143                 | C/T         | A/V         | 5/2              | Yes               |          |
| 440                 | 147                 | A/G         | N/S         | 6/1              | Yes               |          |
| 461                 | 154                 | T/C         | V/A         | 6/1              | Yes               |          |
| 467                 | 156                 | C/A         | T/N         | 4/3              | Yes               |          |
| 468                 | 156                 | C/T         | T/N         | 4/3              | Yes               |          |
| 470                 | 157                 | C/T         | T/I         | 6/1              | Yes               |          |
| 486                 | 162                 | A/G         | S           | 6/1              | No                |          |
| 533                 | 178                 | T/C         | I/T         | 6/1              | Yes               | S-region |
| 609                 | 203                 | G/A         | P           | 5/2              | No                |          |
| 655                 | 219                 | T/A         | S/T         | 6/1              | Yes               |          |
| 813                 | 271                 | G/T         | L           | 6/1              | No                |          |
| 930                 | 310                 | A/C         | S           | 6/1              | No                |          |
| 939                 | 313                 | T/C         | C           | 6/1              | No                |          |
| 1103                | 368                 | T/C         | V/A         | 6/1              | Yes               |          |
| 1121                | 374                 | A/T         | Y/F         | 6/1              | Yes               |          |
| 1140                | 380                 | C/T         | Y           | 6/1              | No                |          |
| 1141                | 381                 | A/C         | S/R         | 6/1              | Yes               |          |
| 1142                | 381                 | G/A         | S/N         | 5/2              | Yes               |          |
| 1172                | 391                 | C/T         | P/L         | 6/1              | Yes               |          |

|      |     |     |     |     |     |  |
|------|-----|-----|-----|-----|-----|--|
| 1188 | 396 | T/C | L   | 6/1 | No  |  |
| 1193 | 398 | C/T | A/V | 5/2 | Yes |  |
