# Supplementary material for: Transmission of Hepatitis B and D Viruses in an African Rural Community
Source: PubMed Central journal article supplement (PMC6143728; doi:10.1128/msystems.00120-18), 2018-09-18
Supplement: sys005182262st3.pdf [file sys005182262st3.pdf]

3e) Pre-S/S region of the 7 HBV/A sequences as well as the 2 OBI HBV/A pre-S/S sequences:

|           | Pre-S1 |    |    |    |     |     | Pre-S2 |   |    |    |    |    |    |    |    |   | S-region |     |     |     |     |     |     |  |
|-----------|--------|----|----|----|-----|-----|--------|---|----|----|----|----|----|----|----|---|----------|-----|-----|-----|-----|-----|-----|--|
| Site      | 5      | 73 | 78 | 97 | 102 | 114 | 1      | 7 | 19 | 22 | 24 | 28 | 35 | 37 | 38 | 4 | 45       | 106 | 194 | 200 | 207 | 217 | 224 |  |
| Consensus | L      | G  | S  | T  | G   | E   | M      | T | G  | F  | A  | N  | V  | T  | T  | I | S        | V   | V   | Y   | S   | P   | A   |  |
| 203       | I      | .  | T  | A  | E   | D   | I      | P | .  | .  | .  | S  | A  | N  | I  | T | T        | .   | A   | .   | N   | .   | V   |  |
| 260       | .      | .  | .  | .  | .   | D   | .      | . | .  | .  | V  | .  | .  | N  | .  | . | .        | .   | .   | F   | N   | .   | .   |  |
| 299       | .      | .  | .  | .  | .   | .   | .      | . | .  | .  | .  | .  | .  | .  | .  | . | .        | .   | .   | .   | .   | .   | .   |  |
| 420       | .      | .  | .  | .  | .   | .   | .      | . | .  | .  | .  | .  | .  | .  | .  | . | .        | .   | .   | .   | .   | .   | .   |  |
| 443       | .      | .  | .  | .  | .   | .   | .      | . | .  | .  | .  | .  | .  | .  | .  | . | .        | .   | .   | .   | .   | .   | .   |  |
| 446       | .      | .  | .  | .  | .   | .   | .      | . | .  | .  | .  | .  | .  | .  | .  | . | .        | .   | .   | .   | .   | .   | .   |  |
| 471       | .      | S  | .  | .  | .   | D   | .      | . | S  | L  | V  | .  | .  | N  | .  | . | .        | .   | .   | .   | R   | L   | V   |  |
| 296occult | .      | .  | .  | .  | .   | .   | .      | . | .  | .  | .  | .  | .  | .  | .  | . | .        | I   | .   | .   | .   | .   | .   |  |
| 405occult | .      | .  | .  | .  | .   | .   | .      | . | .  | .  | .  | .  | .  | .  | .  | . | .        | I   | .   | .   | .   | .   | .   |  |

Blue = amino acid variation exclusively detected in OBI sequences

Yellow = relevant amino acid substitutions discussed in the manuscript
